# Supplementary material
Source: PubMed Central journal article supplement (PMC3862284)

## Supplemental methods and results

Title: Identification of novel *FLI1* and *RUNX1* mutations in six of thirteen families with excessive bleeding and platelet secretion defects

Running title: *FLI1* and *RUNX1* defects associated with bleeding

Authors: J Stockley,<sup>1\*</sup> NV Morgan,<sup>2\*</sup> D Bem,<sup>2</sup> GC Lowe,<sup>2</sup> M Lordkipanidzé,<sup>2</sup> B Dawood,<sup>2</sup> MA Simpson,<sup>3</sup> K Macfarlane,<sup>2</sup> K Horner,<sup>4</sup> VC Leo,<sup>1</sup> K Talks,<sup>5</sup> J Motwani,<sup>6</sup> JT Wilde,<sup>7</sup> PW Collins,<sup>8</sup> M Makris,<sup>1</sup> SP Watson<sup>2</sup> and ME Daly<sup>1</sup> on behalf of the UK GAPP Study Group

\* Equal contribution

## Supplemental Methods.

### *FLI1 constructs, cell culture and transfection*

The QuikChange Lightning Site-Directed Mutagenesis Kit (Qiagen, UK) was used to introduce the p.R337W and p.Y343C substitutions into a wild-type (WT) FLI1 expression plasmid, pSG5-*FLI1*.<sup>5</sup> A DNA fragment corresponding to nucleotides -238 to -1 of the *GP6* promoter and including an ETS-1 binding site [nucleotides -73 to -69], was cloned into pGL3.10 upstream of the firefly luciferase gene to derive pGL3.10GP6[-238/-1].<sup>6</sup> HEK293T cells were co-transfected in 24-well plates with 100ng WT or mutated FLI-1 constructs, 200ng pGL3.10-GP6[-238/-1] and 200ng of Renilla luciferase reporter, pRLnull (Promega, UK) using Lipofectamine LTX (Life Technologies, UK) in a volume of 500 $\mu$ l according to the manufacturer's instructions. Forty-eight hours post-transfection, cells were lysed and *GP6* promoter activity assessed by luciferase assay (Promega, UK). Luciferase levels were normalised for transfection efficiency using Renilla activity and data analysed using a 1way ANOVA applying Tukey's post hoc test.

## Legends to supplemental figures

### **Figure S1. Association of *FLI1* and *RUNX1* alterations with mild thrombocytopenia.**

Platelet counts according to the presence or absence of a *FLI1* or *RUNX1* alteration in the 13 index cases, and affected family members studied. Bars represent median and interquartile range. A significant difference was found between the 2 groups ( $p < 0.05$ ) using the Mann-Whitney U test.

### **Figure S2. ATP secretion in patients studied.**

Standardised ATP secretion in response to 100  $\mu$ M PAR-1 specific peptide SFLLRN (or 1 U/ml thrombin, shown in red) in healthy volunteers, the 13 index cases and affected relatives with (mutation positive) or without (mutation negative) *FLI1* or *RUNX1* alterations, and other patients with platelet secretion defects enrolled in the UK GAPP cohort whose DNA was not sequenced in this study. Bars represent median and interquartile range.  $p < 0.001$  when comparing groups using Kruskal Wallis test with Dunn's adjustment for multiple comparisons. Significant differences ( $p < 0.05$ ) were found for healthy volunteers vs each of the other groups. For all other pairs no significant difference ( $p \geq 0.05$ ) was seen.

Supplemental Figure 1.

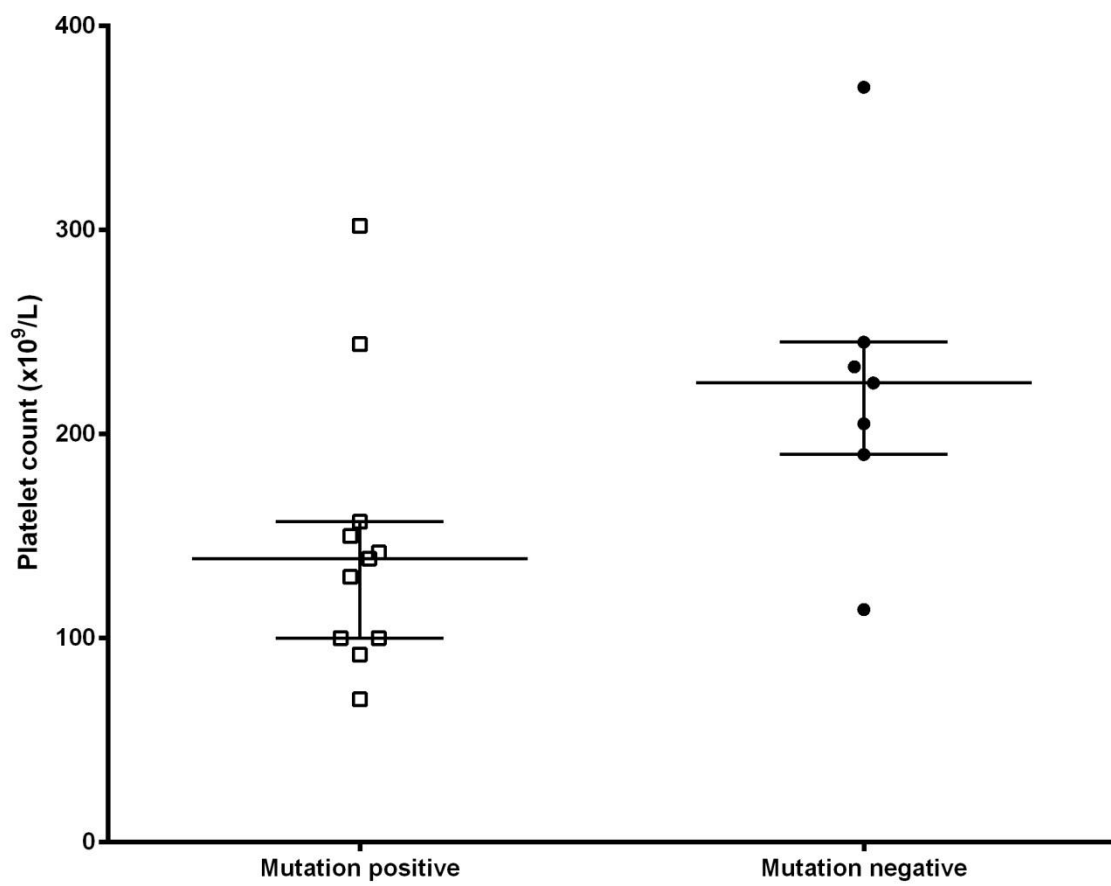

Supplemental Figure 2

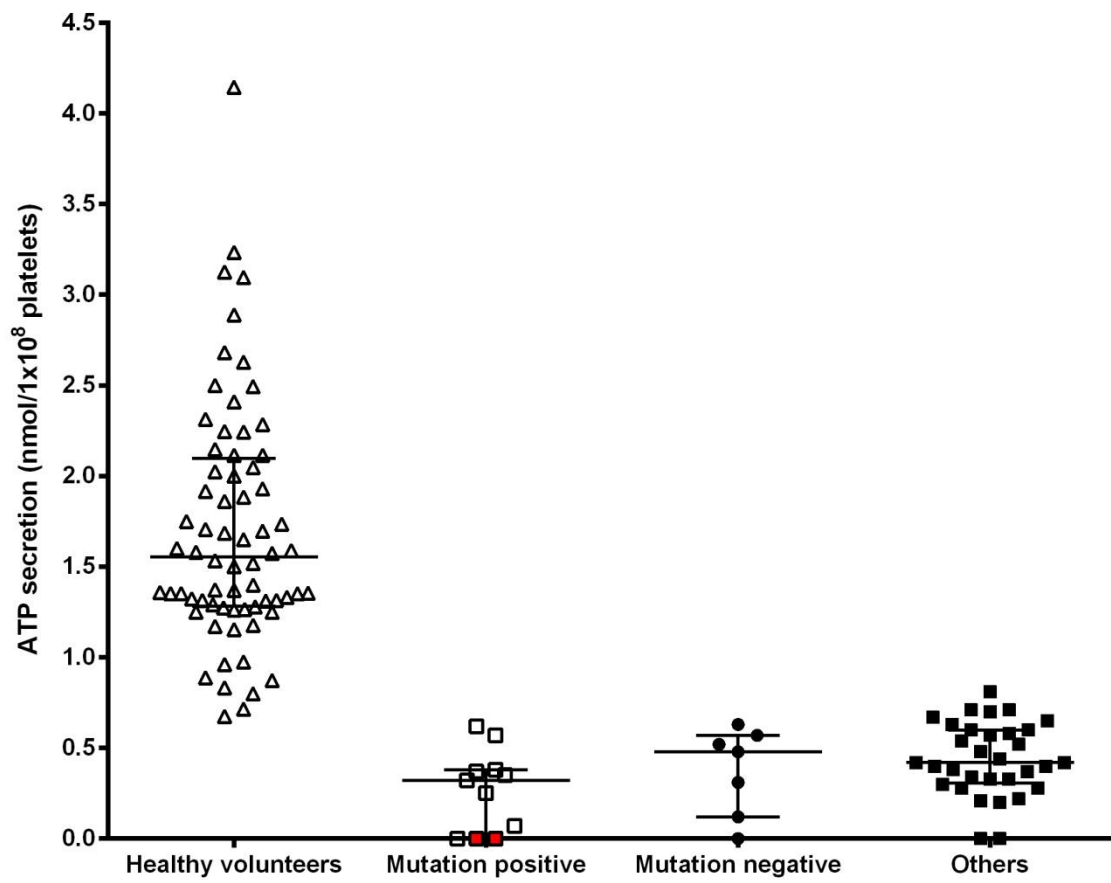

Supplement: supp_blood-2013-06-506873_blood-2013-06-506873-1.pdf [file supp_blood-2013-06-506873_blood-2013-06-506873-1.pdf]
